# Supplementary material for: βIII-Tubulin: A novel mediator of chemoresistance and metastases in pancreatic cancer
Source: PubMed Central journal article supplement (PMC4385848; doi:10.18632/oncotarget.2946), 2014-12-10
Supplement: oncotarget-06-2235-s001.pdf [file oncotarget-06-2235-s001.pdf]

## **$\beta$ III-Tubulin: A novel mediator of chemoresistance and metastases in pancreatic cancer**

### **Supplementary Material**

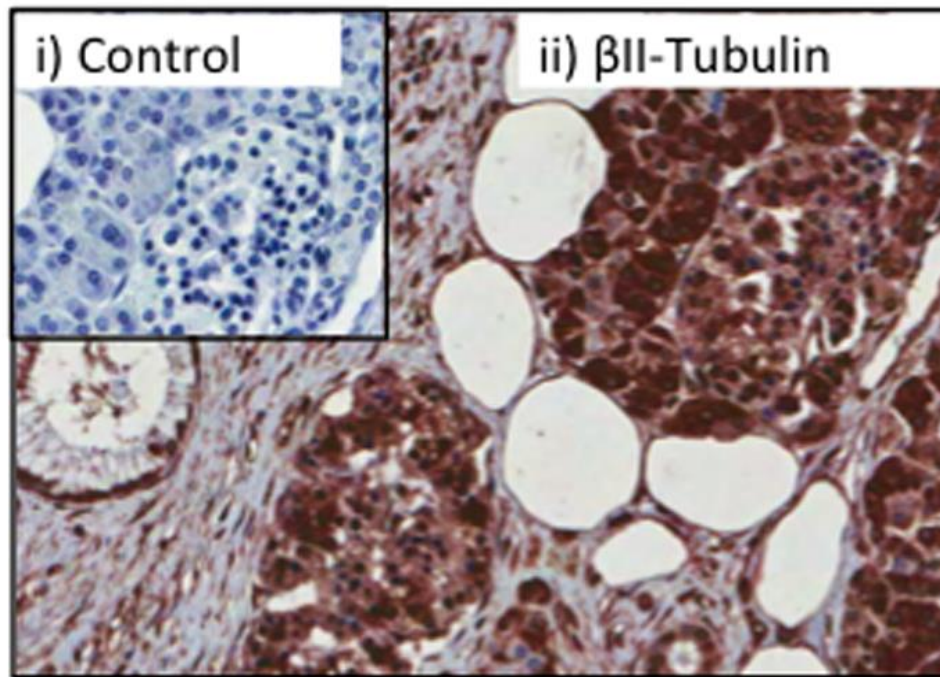

**SUPPLEMENTARY FIGURE 1:**  $\beta$ III-Tubulin is upregulated in PDA patient tissue and PDA cell lines. **A,** Immunohistochemistry for  $\beta$ III-Tubulin in a human PDA tissue specimen; Panels show tissue stained with either isotype control antibody (i) or  $\beta$ III-Tubulin antibody (ii).

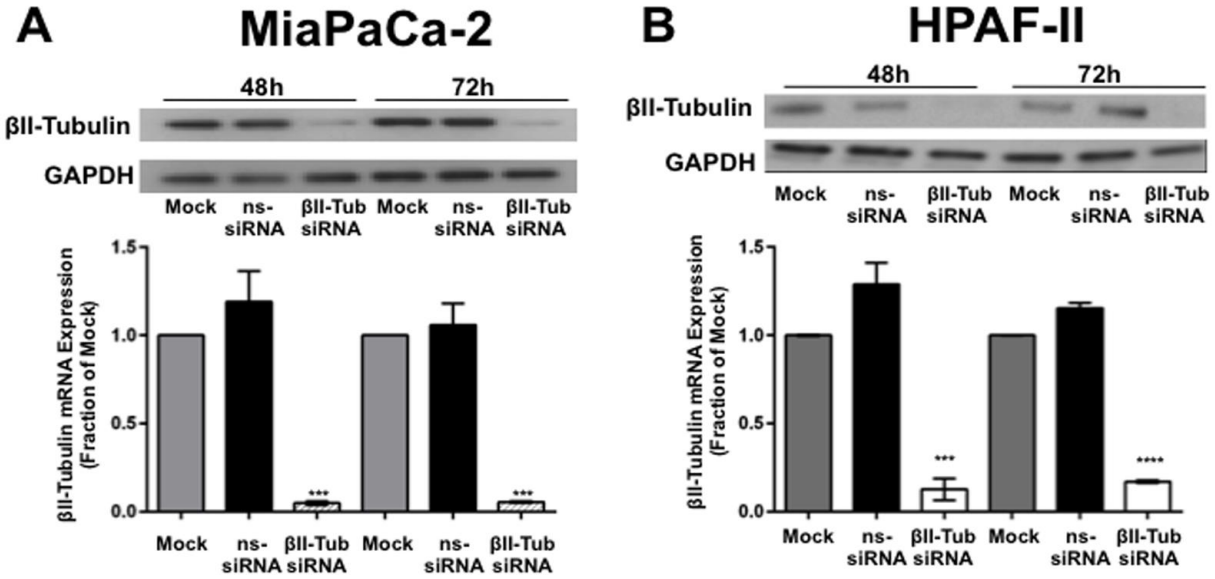

**SUPPLEMENTARY FIGURE 2:**  $\beta$ II-Tubulin silencing in PDA cell lines. **A**, top, Western blot analysis of  $\beta$ II-Tubulin silencing in protein extracts from MiaPaCa-2 cells. Proteins were harvested from cells 48h or 72h after transfection with vector only control (mock), non-silencing siRNA (ns-siRNA), or  $\beta$ III-Tubulin siRNA ( $\beta$ III-Tub siRNA). GAPDH was used as a loading control; bottom, RT-qPCR analysis of  $\beta$ II-Tubulin silencing in MiaPaCa-2 cells. RNA was harvested from cells 48h or 72h after transfection with mock, ns-siRNA, or  $\beta$ III-Tub siRNA.  $\beta$ III-Tubulin mRNA levels were normalized to 18S mRNA. **B**, as per **A**, except extracts were obtained from HPAF-II cells. Asterisks indicate significance according to student two-tailed t-test, (\*\*\*,  $P \leq 0.001$ ; \*\*\*\*,  $P \leq 0.0001$ ).

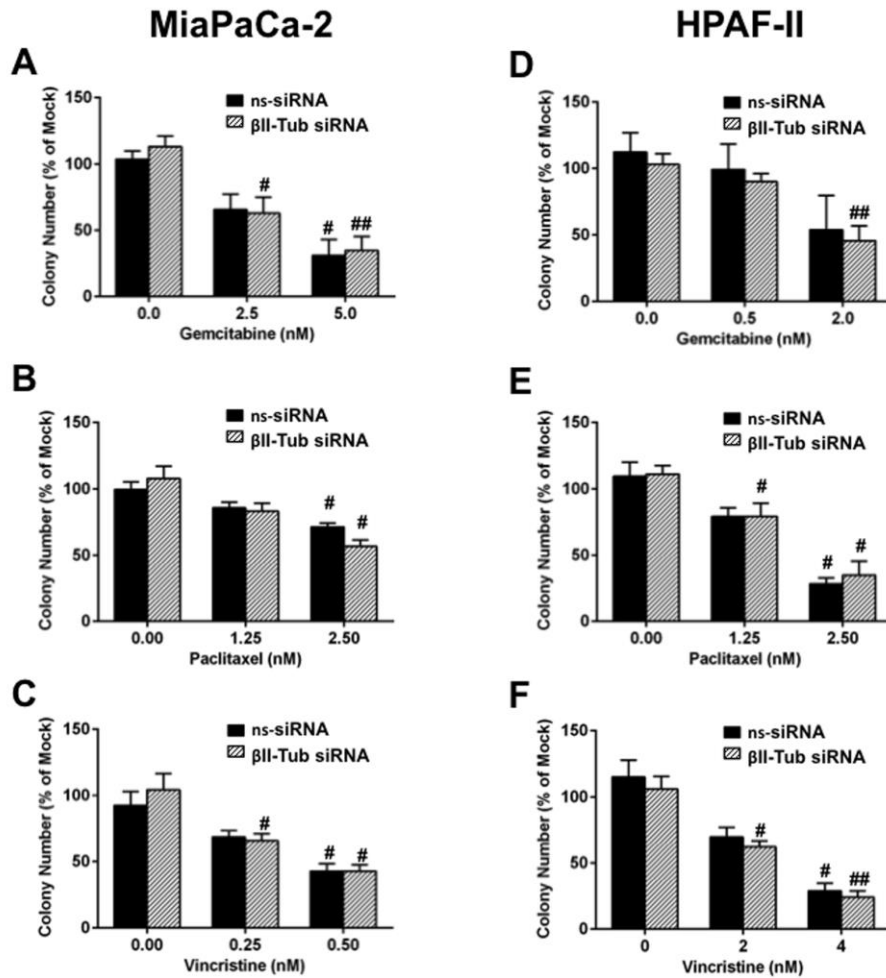

**SUPPLEMENTARY FIGURE 3:** The effect of  $\beta$ II-Tubulin silencing on PDA cell clonogenic capacity. **A-C**, Bars represent the number of MiaPaCa-2 colonies (mean+s.e.m. as a % of mock) that formed from low density seeding following transfection with mock, ns-siRNA, or  $\beta$ II-Tubulin siRNA ( $\beta$ II-Tub siRNA) and 72h culture in titrations of **A**, Gemcitabine, **B**, Taxol or **C**, Vincristine. **D-F**, As per **A-C**, except experiments were done with HPAF-II cells. Hashes indicate significance according to 1-way ANOVA, relative to 0 nM drug concentration of the same siRNA (#,  $P \leq 0.05$ ; ##,  $P \leq 0.01$ ; ####,  $P \leq 0.0001$ ).

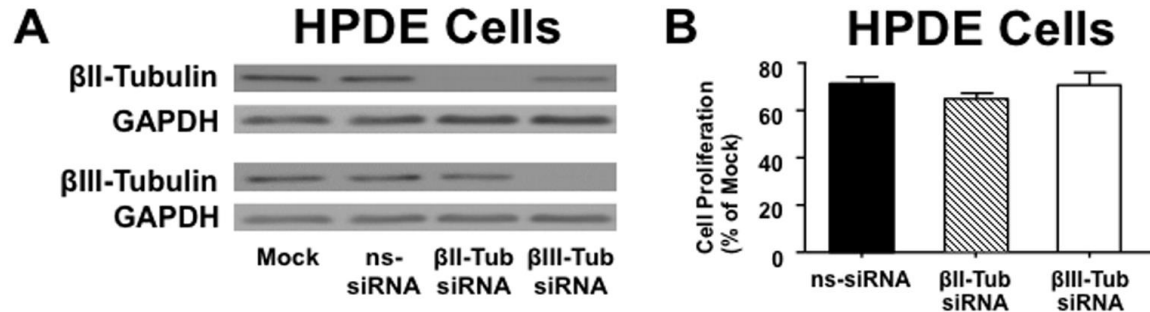

**SUPPLEMENTARY FIGURE 4:** The effect of silencing  $\beta$ II- and  $\beta$ III-tubulin on normal human pancreatic ductal epithelial cell viability. **A)** Western blot analysis for  $\beta$ II- and  $\beta$ III-Tubulin in protein extracts from normal human non-tumorigenic pancreatic ductal epithelial (HPDE) cells transfected with mock, ns-siRNA,  $\beta$ II-Tubulin siRNA ( $\beta$ II-Tub siRNA) or  $\beta$ III-Tub siRNA. GAPDH was used as a loading control. **B)** Bars represent the number of HPDE cells (mean $\pm$ s.e.m. as a % of mock) as determined by cell counting kit-8 proliferation assay 72h post-transfection. HPDE cells were transfected with mock, ns-siRNA,  $\beta$ II-Tub siRNA, or  $\beta$ III-Tub siRNA (n=3).

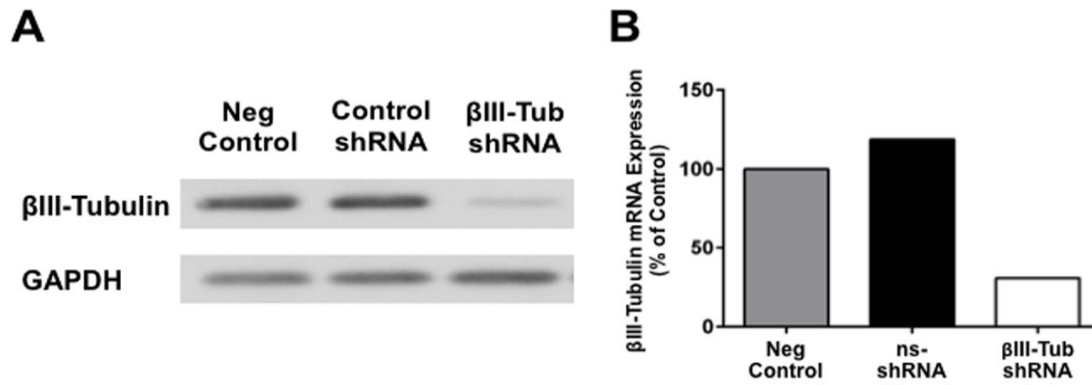

**SUPPLEMENTARY FIGURE 5:**  $\beta$ III-Tubulin silencing in PDA cell lines. **A**, Western blot analysis for  $\beta$ III-Tubulin in protein extracts from MiaPaCa-2 cells stably transfected with ns-shRNA or  $\beta$ III-Tubulin shRNA ( $\beta$ III-Tub shRNA). GAPDH was used as a loading control. **B**, RT-qPCR analysis of  $\beta$ III-Tubulin silencing in MiaPaCa-2 stably transfected with ns-shRNA or  $\beta$ III-Tub shRNA.  $\beta$ III-Tubulin mRNA levels were normalized to 18S mRNA.

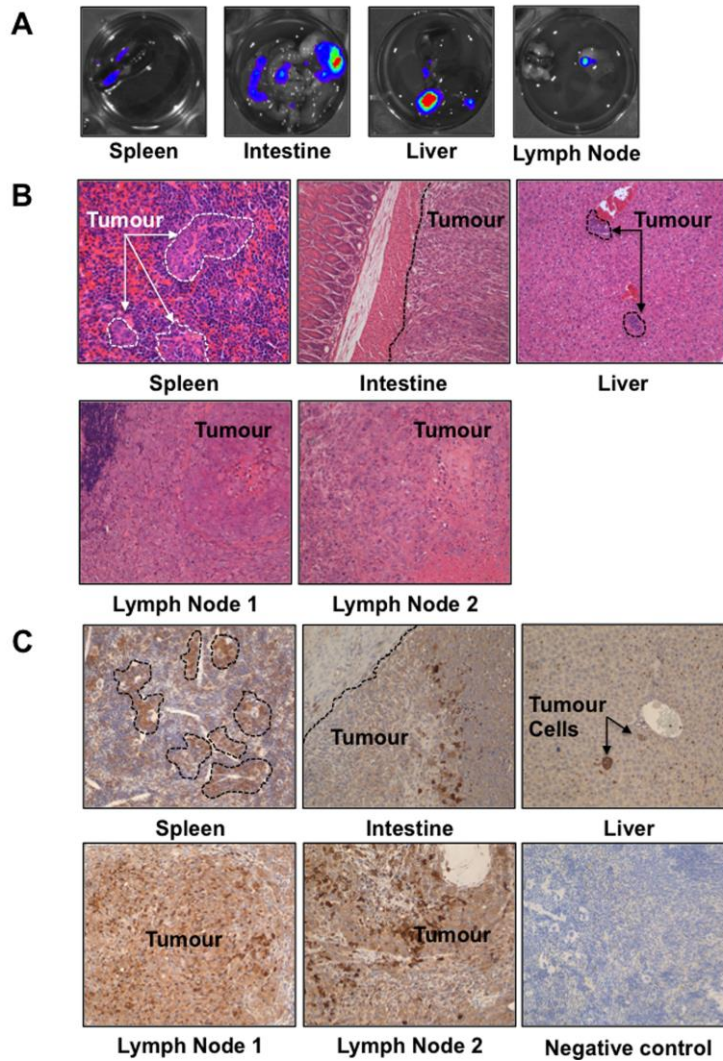

**SUPPLEMENTARY FIGURE 6:** Confirmation of metastases by luminescence and Immunohistochemical staining. **A**, Example of *Ex vivo* luminescence images of organs from control mice showing the presence of luminescent pancreatic tumor cells in the spleen, intestine, liver and lymph node. **B**, H&E staining of organs from control and  $\beta$ III-tubulin knock-down mice that tested positive for metastases by luminescence. Both lymph nodes were superficial cervical nodes and had no normal tissue left. **C**, Immunohistochemical staining of luciferase confirming the presence of pancreatic cancer cells in the spleen, intestine, liver and lymph nodes of control mice.
